## Dynamic Representation of the Subjective Value of Information

Kenji Kobayashi<sup>1</sup>, Sangil Lee<sup>1</sup>, Alexandre L. S. Filipowicz<sup>1</sup>, Kara D. McGaughey<sup>1</sup>, Joseph W. Kable<sup>1</sup>, Matthew R. Nassar<sup>2</sup>

1: University of Pennsylvania, Philadelphia, Pennsylvania, USA

2: Brown University, Providence, Rhode Island, USA

### Correspondence:

Kenji Kobayashi, University of Pennsylvania, Philadelphia, Pennsylvania, USA; [kenjik@sas.upenn.edu](mailto:kenjik@sas.upenn.edu)

### Abstract

To improve future decisions, people should seek information based on the value of information (*VOI*), which depends on the current evidence and the reward structure of the upcoming decision. When additional evidence is supplied, people should update *VOI* to adjust subsequent information seeking, but the neurocognitive mechanisms of this updating process remain unknown. We used a modified beads task to examine how the *VOI* is represented and updated in the human brain. We theoretically derived, and empirically verified, a normative prediction that the *VOI* depends on decision evidence and is biased by reward asymmetry. Using fMRI, we found that the subjective *VOI* is represented in right dorsolateral prefrontal cortex (DLPFC). Critically, this *VOI* representation was updated when additional evidence was supplied, showing that DLPFC dynamically tracks the up-to-date *VOI* over time. These results provide new insights into how humans adaptively seek information in the service of decision making.

## 1 Introduction

2  
3 Information seeking is critical for adaptive decision making. In order to improve future  
4 decisions, we collect information that would help us predict their outcomes. For  
5 instance, we check the weather forecast to decide whether to go out for a hike; we read  
6 about the policies and characters of candidates to decide how to vote; and we look up  
7 the number of COVID-19 cases to decide whether to have a family gathering. Recent  
8 work raises the possibility that deficits in information seeking underlie some psychiatric  
9 diseases such as schizophrenia and obsessive-compulsive disorder (OCD) (Baker et  
10 al., 2019; Dudley et al., 2016; Hauser et al., 2017; Ross et al., 2015).

11  
12 In economic theories, information seeking should be primarily driven by information's  
13 instrumentality, or how much the information would help the agent acquire rewards and  
14 avoid punishments in an upcoming decision. The information's instrumentality is  
15 formally characterized as the value of information (*VOI*), defined as the improvement in  
16 the expected value (*EV*) that the agent can achieve by making the decision based on  
17 the information (Edwards, 1965; Howard, 1966). While this normative *VOI* theory does  
18 not incorporate psychological motives of curiosity, such as anticipatory utility (Caplin &  
19 Leahy, 2001; Gottlieb & Oudeyer, 2018; Kakade & Dayan, 2002; Kidd & Hayden, 2015;  
20 Kobayashi et al., 2019; Kreps & Porteus, 1978; Sharot & Sunstein, 2020), it predicts  
21 human participants' information-seeking decisions reasonably well in settings where  
22 they acquire information at a cost (such as monetary costs or opportunity costs) that  
23 can be used to maximize rewards (Edwards & Slovic, 1965; Kobayashi & Hsu, 2019;  
24 Shanteau & Anderson, 1972; Wendt, 1969; Wilson et al., 2014). The idea that  
25 information seeking is driven by the *VOI* is further supported by electrophysiological and  
26 neuroimaging evidence that the *VOI* is encoded in reward-related regions (e.g., nucleus  
27 accumbens, ventromedial prefrontal cortex) as well as anterior cingulate cortex (ACC)  
28 and dorsolateral prefrontal cortex (DLPFC) (Blanchard et al., 2015; Bromberg-Martin &  
29 Hikosaka, 2009, 2011; Brydevall et al., 2018; Charpentier et al., 2018; Gruber et al.,  
30 2014; Jepma et al., 2012; Kaanders et al., 2020; Kang et al., 2009; Kobayashi & Hsu,  
31 2019; Krebs et al., 2009; Lau et al., 2020; White et al., 2019).

32  
33 The notion of the *VOI* based on the information's instrumentality has two important  
34 implications. First, the *VOI* should not be determined by how much the information  
35 would contribute to the accuracy of prediction on the *state* of the world, but rather how  
36 much it would help the agent maximize *rewards*. Therefore, the *VOI* depends on the  
37 upcoming decision's reward structure, or how rewarding or punishing possible  
38 outcomes are (for instance, the value of a weather forecast depends on how much the  
39 hiker prefers different weather conditions; those who don't mind hiking in the rain or  
40 snow may not value the weather forecast as much as those who do). Second, the *VOI*  
41 depends on decision evidence that the agent already possesses prior to information  
42 seeking (Loewenstein, 1994). The *VOI* tends to be smaller when the agent already has  
43 more evidence, because they may already know what to do and additional information  
44 is less likely to influence it (e.g., a hiker may not need to check the weather forecast if

45 they have been already informed by other hikers that it is going to snow). Thus, the  
46 agent needs to combine the available decision evidence with the reward structure to  
47 assess the *VOI* and seek information adaptively.

48

49 Crucially, when the decision evidence available to the agent changes, the agent should  
50 dynamically update the *VOI* based on the most recent evidence. Situations requiring  
51 such updating are ubiquitous in the real world, either because the environment  
52 gradually supplies evidence over time (e.g., a recent weather forecast is more accurate  
53 than an old one) or because the agent sequentially samples multiple pieces of  
54 information (the hiker can check multiple sources of weather forecasts). Despite its  
55 importance, to the best of our knowledge, no study has examined how the human brain  
56 tracks the up-to-date *VOI* based on the most recent decision evidence. The majority of  
57 neuroimaging studies so far have focused on cases where information is not  
58 instrumental for upcoming decisions, and those that have examined instrumentality-  
59 driven information seeking did not experimentally manipulate decision evidence over  
60 time to characterize the neural processes of updating the *VOI* (Kaanders et al., 2020;  
61 Kobayashi & Hsu, 2019).

62

63 We conducted an fMRI study to examine how human information-seeking behavior is  
64 sensitive to reward structure and current decision evidence, and how human brains  
65 track the up-to-date *VOI* after acquiring additional evidence. Our contributions are three-  
66 fold. First, we theoretically derive, and empirically demonstrate, a simple and  
67 generalizable prediction for how information seeking should be biased by asymmetry in  
68 reward structure. Second, we show that the right DLPFC represents the subjective *VOI*  
69 as a function of asymmetric rewards and current evidence. Third, we show that the *VOI*  
70 representation in the right DLPFC is dynamically updated when a new piece of evidence  
71 is supplied. These results suggest that the right DLPFC plays a critical role in  
72 information seeking in dynamic decision-making contexts by tracking the up-to-date *VOI*  
73 over time.

74 **Results**

75

76 **Experimental paradigm**

77 To examine neural representations of the value of information (*VOI*) and its updating,  
 78 we adopted a variant of the beads task, an experimental paradigm widely used to study  
 79 probability judgement and information seeking (Furl & Averbek, 2011; Huq et al., 1988;  
 80 Phillips & Edwards, 1966). As in the conventional version of the beads task, participants  
 81 were presented with a jar containing two types of beads, one marked with a face and  
 82 the other marked with a house, and asked to make a bet on its bead composition by  
 83 observing some beads drawn from it. There were two possible compositions of the jar:  
 84 one that consists of 60% face beads and 40% house beads, and the other that consists  
 85 of 40% face beads and 60% house beads (Fig. 1A).

86

87 Our variant of the beads task had three key features. First, we introduced reward  
 88 asymmetry, such that participants could earn more reward by correctly betting on one

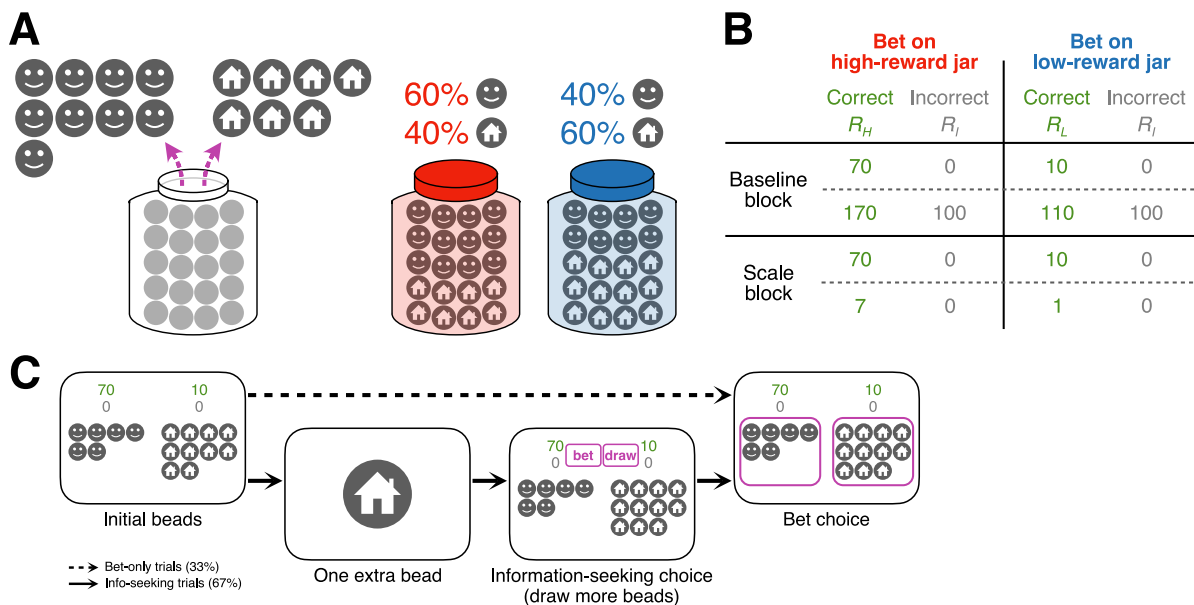

**Fig. 1.** Experimental paradigm. We adopted the beads task with three key modifications: asymmetry in the reward structure, initial evidence prior to information seeking, and an updating event (one extra bead). (A) Participants observed a number of beads drawn from a jar and made a bet on its composition. Each bead was marked with a face or a house. There were two possible jar compositions: 60% face beads and 40% of house beads, or 40% face beads and 60% house beads. The jars are colored here only for illustrative purposes. (B) Reward structure. Participants earned more reward points by correctly betting on one of the two jar types. The experiment consisted of two blocks, in each of which one of the two reward structures was presented in each trial. The first block involved a baseline shift and the second block involved a scale manipulation. (C) Trial sequence. In a third of the trials (bet-only trials), participants were presented with a number of beads from the jar and immediately made a bet on its type. In the remaining trials (information-seeking trials), they were presented with the initial beads, an extra bead, and then allowed to seek further information by drawing more beads from the jar before making a bet on one of the two jars. Participants could draw as many beads as they needed within five seconds, but each additional draw incurred a cost (0.1 points). The extra bead was presented to evoke updating in the value of information.

89 jar type (e.g., the face-majority jar) than the other (e.g., the house-majority jar) (Fig. 1B).  
90 If participants were motivated to seek information to maximize rewards in the bet, their  
91 information-seeking strategy should be sensitive not only to the current evidence (the  
92 numbers of observed beads so far) but also to the reward asymmetry (the jar type they  
93 should bet on to maximize rewards). On the other hand, if participants were motivated  
94 to accurately guess the jar type, their information seeking should not be sensitive to the  
95 reward asymmetry. Therefore, the reward asymmetry allowed us to test whether  
96 information seeking was driven by the instrumentality of information for future reward  
97 seeking, as normatively prescribed in economic theories.

98  
99 Second, we provided initial evidence, in the form of 20 or 30 bead draws from the jar.  
100 On a subset of trials, participants could then seek more information about the jar  
101 composition by drawing additional beads or elect to make a bet on the jar type (Fig. 1C).  
102 The difference in the numbers of face beads and house beads was parametrically  
103 manipulated to range from strong evidence favoring the low-reward jar to strong  
104 evidence favoring the high-reward jar. Additional draws incurred a small constant cost  
105 (0.1 points per draw) to monetarily incentivize participants to seek information only  
106 when necessary. This design allowed us to empirically measure the subjective *VOI*, or  
107 how much participants were willing to seek costly information, as a function of the  
108 current evidence.

109  
110 Third, on the trials that allowed for information seeking, participants were presented with  
111 one extra bead draw from the jar prior to the information-seeking phase (Fig. 1C). The  
112 extra bead complemented the initial beads, shifting the evidence on the jar  
113 compositions, and thus updated the *VOI* originally evaluated based on the initial beads.  
114 We analyzed neural responses upon this extra bead event to examine how the neural  
115 representation of the *VOI* is dynamically updated based on the up-to-date evidence over  
116 time.

117  
118 Participants completed the task inside the scanner. In each trial, after the presentation  
119 of initial beads and an extra bead, participants were allowed to draw as many additional  
120 beads as they wanted within five seconds, and then made a binary bet on the jar type.  
121 Additionally, to empirically elucidate participants' reward-seeking behavior in a way that  
122 is not contaminated by information seeking, participants were asked to make a bet on  
123 the jar type without information seeking in a subset of trials (bet-only trials). Lastly, to  
124 explore how information seeking is sensitive to rewards, we introduced trial-wise  
125 manipulation of the reward structures. Specifically, participants earned a baseline  
126 reward of 100 points, irrespective of their bet, in half of the trials in one block  
127 (henceforth the baseline block), and they earned a tenth of the rewards in half of the  
128 trials in the other block (henceforth the scale block). Importantly, the reward of a correct  
129 bet was asymmetric across all trials and blocks (Fig. 1B).

## 130 131 **Theory**

132 We first derived a theoretical prediction on how agents should seek information to

133 optimize their bet and maximize rewards. We obtained theoretical *VOI* under the  
 134 assumption that the agent aims to maximize the expected value (*EV*) of their decision,  
 135 which they evaluate based on posterior probability of the jar type inferred in a perfectly  
 136 Bayesian manner.

137

138 The posterior of the jar type is determined by the numbers of high-reward beads (the  
 139 majority bead in the high-reward jar, e.g., face) and low-reward beads (the majority  
 140 bead in the low-reward jar, e.g., house) observed from the jar so far (Fig. 2A). The more

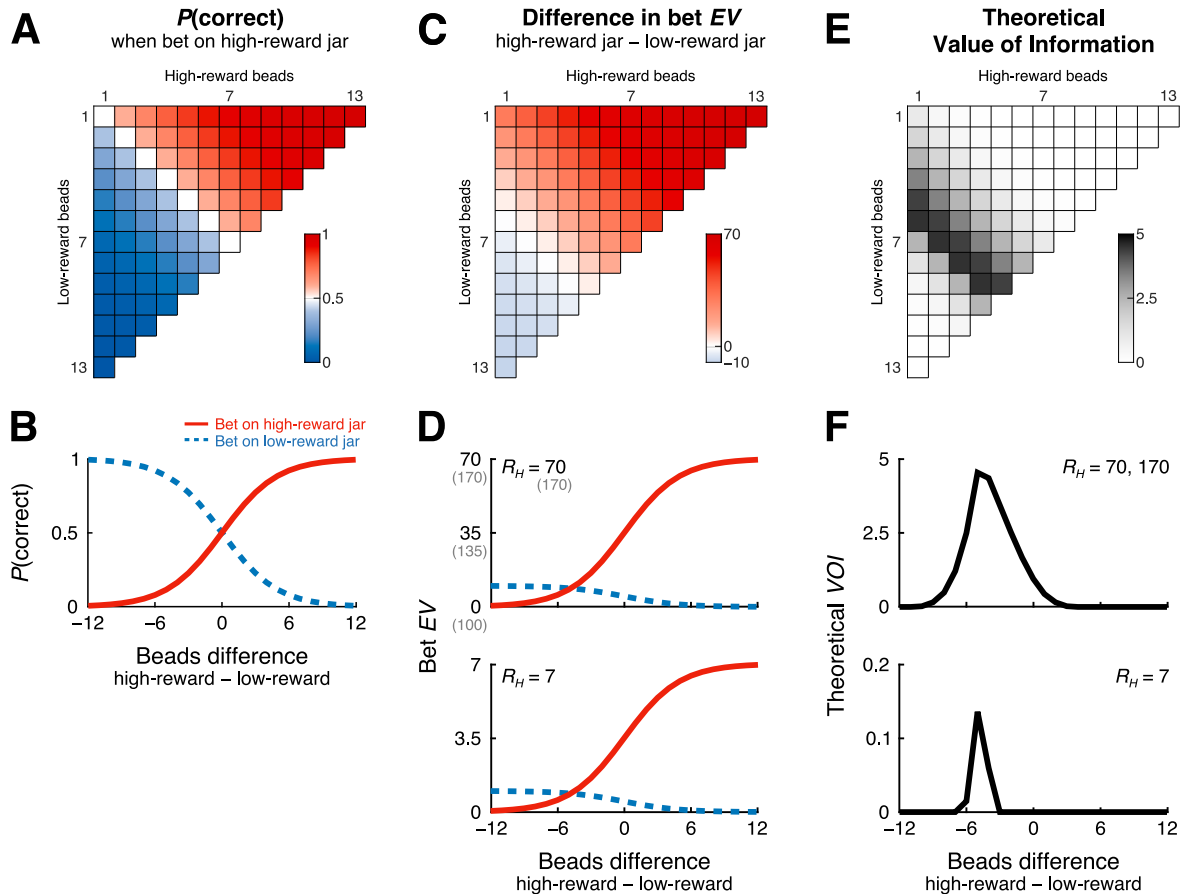

**Fig. 2.** Theoretical predictions. (A) The probability of the jar type (the true jar is the high-reward jar) increases with the number of observed high-reward beads and decreases with the number of observed low-reward beads. (B) The probability of the jar type is determined by the beads difference. (C) Due to the reward asymmetry, when equal numbers of high-reward and low-reward beads have been observed (the diagonal), the *EV* to bet on the high-reward jar is higher than the low-reward jar. The agent would experience the smallest *EV* difference, and hence the highest uncertainty on the bet, when more low-reward beads have been drawn (the white region). (D) The *EV* difference is smallest at the beads difference of  $-5$  across all reward structures. *Top*: Bet *EV*s are not affected by a baseline shift in rewards. *Bottom*: The relative magnitudes of *EV*s remain the same when rewards are scaled down overall. (E) The theoretical *VOI* is highest when the uncertainty on the bet is highest (the beads difference =  $-5$ , the black region). This is because the next bead would provide evidence in favor of either jar type, resolving the uncertainty. (F) The theoretical *VOI* takes an inverted-*U* shape across all reward structures. *Top*: The *VOI* is unaffected by a baseline shift in rewards. *Bottom*: When the rewards are scaled down, the magnitude of *VOI* becomes smaller as well, but the peak location remains the same. *EV*: expected value, *VOI*: value of information.

141 high-reward beads have been drawn, the more likely the jar is the high-reward jar, and  
142 vice versa. More specifically, the posterior is determined by the difference in the  
143 numbers of observed beads (high-reward beads minus low-reward beads) (Fig. 2B; Eq.  
144 1). When more high-reward beads have been observed than low-reward beads (the  
145 beads difference  $> 0$ ), the probability of the high-reward jar is higher than the probability  
146 of the low-reward jar, and it increases with the beads difference. Conversely, when  
147 more low-reward beads have been observed (the beads difference  $< 0$ ), evidence  
148 favors the low-reward jar.

149  
150 In order to evaluate the *EV* of a bet, the agent needs to combine the posterior on the jar  
151 type with the reward structure (Fig. 2C). Due to the reward asymmetry, when the current  
152 evidence does not favor either jar (the beads difference = 0; the diagonal in Fig. 2C), the  
153 *EV* to bet on the high-reward jar is higher than the *EV* to bet on the low-reward jar. The  
154 *EVs* to bet on the two jars are closest to each other when more low-reward beads have  
155 been observed (the beads difference =  $-5$ ; the white region in Fig. 2C). This prediction  
156 holds across all of our reward structures (Fig. 2D); a baseline shift in rewards does not  
157 affect the *EV* difference, and a scale manipulation in rewards multiplicatively affect both  
158 *EVs* without changing their relative magnitudes. Therefore, if forced to bet on one of the  
159 two possible jars, the *EV*-maximizing agent would experience the highest choice  
160 uncertainty, not when equal numbers of beads have been observed, but when more  
161 low-reward beads have been observed than high-reward beads.

162  
163 Under economic theories, the *VOI*, or the value of drawing an additional bead, is  
164 evaluated based on how much the next bead would improve the upcoming bet on  
165 average (Eq. 2). Qualitatively, the theoretical *VOI* tends to increase with the uncertainty  
166 about which jar type to bet on, because an additional bead would provide more  
167 evidence for either jar type and resolve the uncertainty over possible actions (Fig. 2E).  
168 For instance, when the agent is under high uncertainty on the bet (the beads difference  
169 =  $-5$ ; the black region in Fig. 2E), an additional bead would help them make a bet  
170 *irrespective of its type*; if the next bead is a high-reward bead, it provides additional  
171 evidence in favor of the high-reward jar, whereas if it is a low-reward bead, it favors the  
172 low-reward jar. The agent can improve the *EV* by making a bet conditional on the next  
173 bead type. On the other hand, when the agent has observed more high-reward beads  
174 than low-reward beads (e.g., the beads difference =  $+10$ ; top right in Fig. 2E), or when  
175 the agent has observed many more low-reward than high-reward beads (e.g., the beads  
176 difference =  $-10$ ; bottom left in Fig. 2E), an additional bead would not affect the  
177 subsequent bet; the agent would bet on the high-reward jar or low-reward jar,  
178 respectively, no matter what the next bead would be. Therefore, the theoretical *VOI*  
179 takes an inverted-*U* shape as a function of the beads difference, with its peak at a  
180 negative beads difference ( $-5$ ) (Fig. 2F).

181  
182 Therefore, our theoretical framework yields an important prediction that the information-  
183 seeking strategy should be biased by the reward asymmetry; participants should draw  
184 additional beads more frequently when more low-reward beads have been observed

185 than high-reward beads (the beads difference  $< 0$ ). The predicted bias holds across  
186 reward structures (Fig. 2F); manipulation of the reward baseline (in the baseline block)  
187 does not affect the *VOI*, and manipulation of the reward scaling (in the scale block)  
188 affects the overall magnitude of the *VOI* but does not drastically alter its inverted-*U*  
189 shape. This prediction might be somewhat counterintuitive, as the motivation for  
190 information seeking is expected to be higher when the current evidence favors the less  
191 desirable state (the low-reward jar). However, it is consistent with the widespread notion  
192 of confirmation bias that an agent needs less evidence to bet on a desirable state than  
193 an undesirable state (e.g., Gesiarz et al., 2019). More generally, the prediction echoes  
194 the general assumption that information seeking should be driven not by the motivation  
195 to predict the *state* (which jar is the true jar?) but to maximize *rewards* (which jar to bet  
196 on?). If, in contrast to our theoretical assumption, an agent is solely motivated to  
197 accurately predict the state, they would seek information the most when the beads  
198 difference is zero. Therefore, a bias in information seeking would suggest that  
199 participants seek information based on its instrumentality for future reward seeking, as  
200 normatively prescribed. To our knowledge, the bias in information seeking under the  
201 reward asymmetry is a novel theoretical prediction that has not yet been directly tested.

202

## 203 **Behavior**

204 We examined participants' information-seeking behavior, and in particular, whether it  
205 was biased due to the reward asymmetry as predicted. If participants sought to improve  
206 their subsequent bet choice and maximize rewards, the frequency of information  
207 seeking (i.e., how often they drew at least one bead) should be biased towards a  
208 negative beads difference, i.e., when more low-reward beads have been drawn than  
209 high-reward beads.

210

211 Observed information-seeking behavior was biased in the predicted direction (Fig. 3A).  
212 In both baseline and scale blocks, the frequency of drawing an additional draw was  
213 highest when more low-reward beads had been drawn than high-reward beads.  
214 Sensitivity to the reward asymmetry was also confirmed by the bet on the jar type in the  
215 bet-only trials (Fig. 3B); the frequency of betting on the high-reward jar increased with  
216 the beads difference, and the indifference point (the point at which participants were  
217 equally likely to bet on either jar) was shifted towards a negative beads difference.  
218 These results show that participants incorporated both the current evidence and reward  
219 asymmetry in reward-seeking and information-seeking choices.

220

221 A notable deviation from the theoretical prediction is that participants' information  
222 seeking was not sensitive to the reward scale manipulation. In our framework, the  
223 theoretical *VOI* is smaller when the rewards are scaled down (even though its peak  
224 location remains the same) while it is unaffected by a reward baseline shift (Fig. 2F).  
225 Thus, if our participants were perfectly sensitive to the reward structure on a trial-by-trial  
226 basis, their information seeking should be affected by trial-wise reward manipulation in  
227 the scale block but not in the baseline block. To test this, we examined how information-  
228 seeking behavior differed across reward conditions and blocks. To characterize the



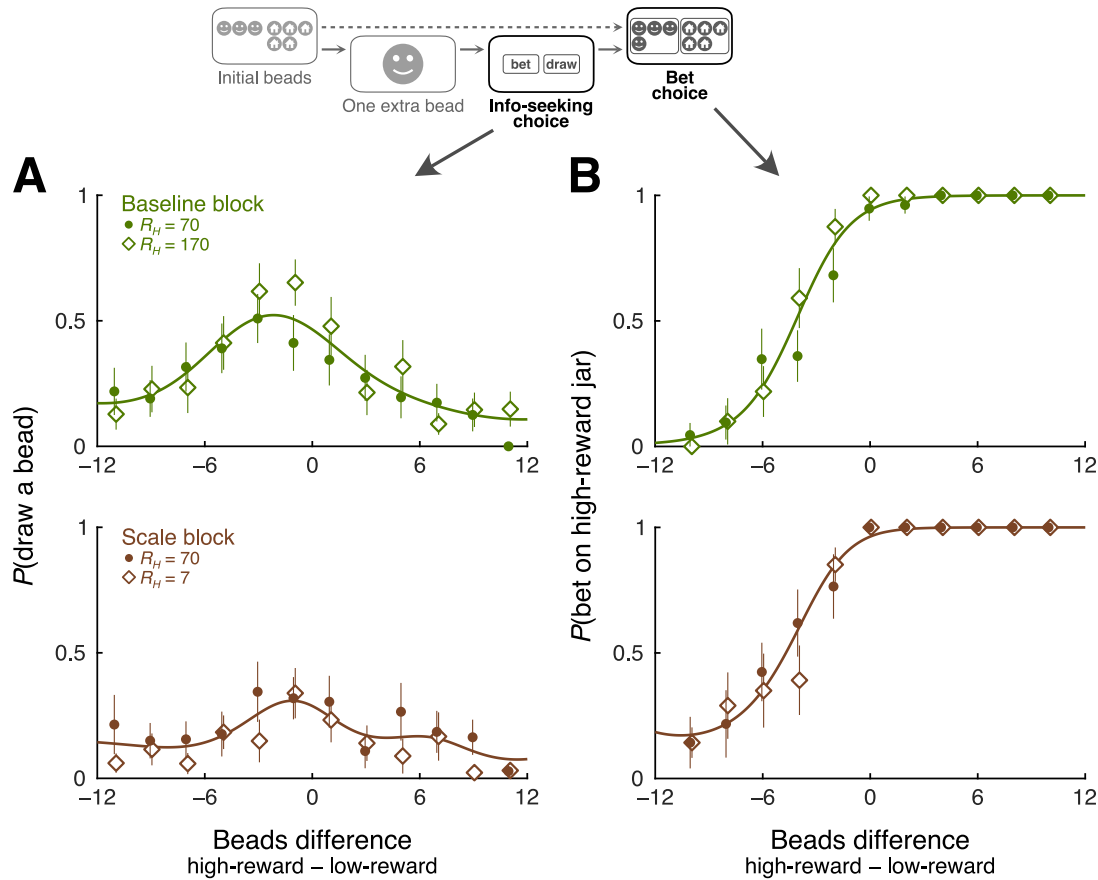

**Fig. 3.** Behavior. Participants' information-seeking and reward-seeking behavior was biased by the reward asymmetry as predicted. (A) Participants' information seeking, or the frequency at which they drew at least one bead, peaked when more low-reward beads had been drawn than high-reward beads. (B) In the bet-only trials, the frequency with which they bet on the high-reward jar increased with the beads difference and was biased by the reward asymmetry. Lines indicate the best-fit model, which assumed sensitivity to blocks but not to reward manipulations within blocks. Error bars: bootstrap SD resampling participants.

229 relationship between information seeking and the beads difference without assuming its  
 230 functional form, we used Gaussian Process (GP) logistic regression (Rasmussen &  
 231 Williams, 2006). We fit four models to participants' behavior; Model 1 assumed  
 232 sensitivity to the scale manipulation but not to the baseline manipulation, as normatively  
 233 prescribed; Model 2 assumed sensitivity to both manipulations; Model 3 assumed a  
 234 difference between blocks but no sensitivity to manipulation in either block; and Model 4  
 235 assumed no difference between blocks or reward conditions. We found that Model 3  
 236 outperformed other models, including Model 1, according to both leave-one-participant-  
 237 out cross validation (LOPO CV; log likelihoods [LL] = -1216.93, -1216.15, -1214.73,  
 238 and -1232.15) and leave-one-trial-out cross validation (LOTO CV; LL = -1143.61,  
 239 -1143.76, -1142.25, and -1166.17). Therefore, participant's information-seeking  
 240 behavior was systematically different between blocks, even though they did not change  
 241 their strategy based on the reward structure on a trial-by-trial basis.  
 242

243 We speculate that shifting information-seeking strategies on a trial-by-trial basis was too  
244 cognitively taxing for our participants, because we also manipulated the beads  
245 difference and the trial type (information-seeking or bet-only). Despite this limitation, we  
246 observed that participants' information seeking exhibited a clear bias in both blocks.  
247 Indeed, we observed that Model 3, which allowed asymmetry in information seeking,  
248 performed better than another model (Model 5) that assumed symmetric information  
249 seeking (baseline block LOPO CV LL = -666.82 [Model 3] vs. -679.52 [Model 5]; LOTO  
250 CV LL = -630.87 vs. -645.10; scale block LOPO CV LL = -547.92 vs. -548.13; LOTO  
251 CV LL = -511.68 vs. -512.53). Furthermore, analysis on betting choices also preferred  
252 Model 3 to Models 1 and 2 (comparison between Models 3 and 4 is equivocal; LOPO  
253 CV LL = -287.01, -285.67, -283.56, and -281.19; LOTO CV LL = -267.77, -266.25,  
254 -265.26, and -268.46), showing that participants were insensitive to trial-wise reward  
255 manipulation not only in information seeking but also in reward seeking. These results  
256 are qualitatively consistent with our theoretical prediction and lend support to the  
257 general notion that people seek information to improve their subsequent choices and  
258 maximize rewards.

259

### 260 **Neural representation of *VOI***

261 Next, we examined how the *VOI* was represented in the brain. Although previous fMRI  
262 studies reported *VOI* representations in a set of regions including DLPFC, VMPFC, and  
263 striatum, most of these studies focused on situations where participants obtained  
264 information that would not be useful for future decisions (i.e., information seeking for its  
265 own sake), and one study that examined instrumentality-driven information seeking  
266 used a one-shot paradigm that did not involve any updating (Kobayashi & Hsu, 2019).  
267 Thus, it remains unknown to what extent the neural representation of *VOI* is  
268 generalizable across tasks and decision contexts, and whether previously reported  
269 regions also represent and update the *VOI* in our experimental paradigm.

270

271 To look for brain regions that represent the *VOI*, we empirically estimated subjective  
272 *VOI* from the information-seeking behavior. We used the winning model of our GP  
273 logistic regression analysis (Model 3) to obtain the latent value function, which varied  
274 smoothly with the beads difference and differed between blocks (Fig. 4A). We then  
275 looked for regions where neural responses at the presentation of initial beads covaried  
276 with the subjective *VOI*.

277

278 We found a cluster in the right DLPFC representing subjective *VOI* (Fig. 4B; cluster-  
279 forming threshold  $p < .001$ , cluster-mass  $p < .05$ , whole-brain FWE corrected; peak MNI  
280 coordinate = [48, 42, 24]). Activation in this cluster peaked when more low-reward  
281 beads had been drawn in both blocks, consistent with the prediction (Fig. 4C). This  
282 cluster is the only one that survived our whole-brain statistical threshold (we also  
283 observed a cluster in the right anterior insula at a more lenient threshold,  $p < .10$ ; peak  
284 MNI coordinate = [30, 24, 4]; Fig. S1).

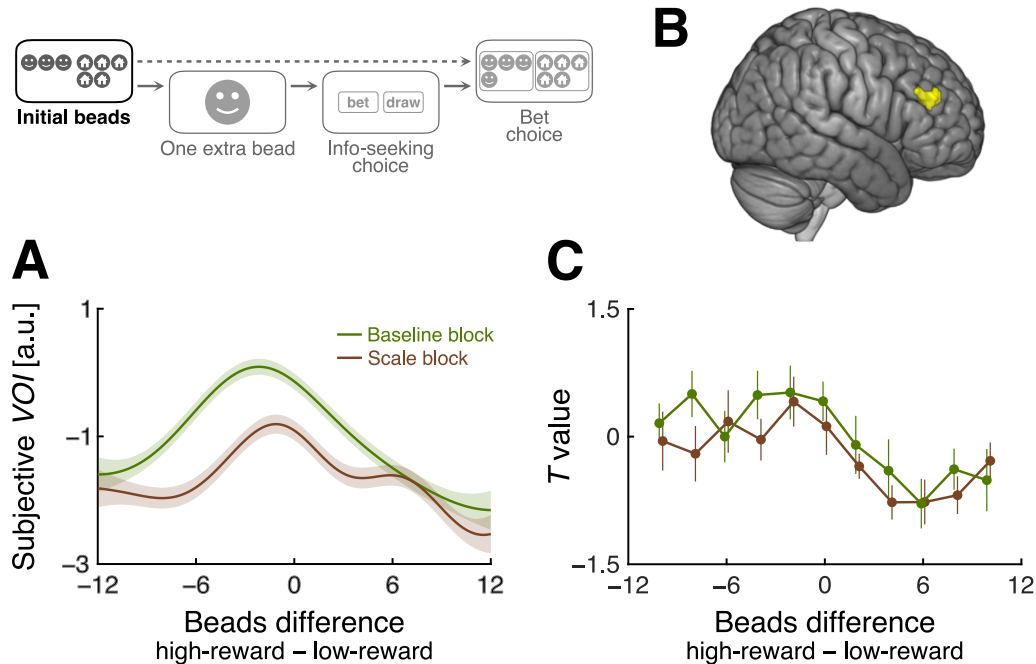

**Fig. 4.** Neural representation of the *VOI*. (A) The subjective *VOI* was estimated for each block based on information-seeking behavior (Fig. 3A). (B) The right DLPFC represented the subjective *VOI* (cluster-mass  $p < .05$ , whole-brain FWE corrected; the peak MNI coordinate: [48, 42, 24]). (C) As predicted, the right DLPFC activation peaks at a negative beads difference in both blocks. Error bars: SEM.

285

286 Interestingly, the DLPFC cluster overlaps with a *VOI* cluster reported in a previous study  
 287 that examined one-shot instrumentality-driven information seeking (Kobayashi & Hsu,  
 288 2019) (Fig. S1), providing converging evidence that the right DLPFC represents the *VOI*  
 289 across decision contexts, at least when information is primarily acquired based on its  
 290 instrumentality for future value-guided decisions.

291

### 292 **Updating of *VOI* representation**

293 We then turned to our final question: how is the *VOI* updated upon the arrival of  
 294 additional evidence in the brain? When the evidence available to agents changes, they  
 295 need to track the up-to-date *VOI* in order to seek information adaptively over time.

296 Specifically, we examined how the right DLPFC responds to the extra bead presented  
 297 after the initial beads but prior to the information-seeking choice (Fig. 5A). We derived  
 298 the *VOI* updating, or the difference between the posterior and prior *VOI*, as a function of  
 299 the difference in the initial beads (the prior evidence) and the type of the extra bead (the  
 300 evidence that causes updating). For instance, if participants have observed many more  
 301 low-reward beads than high-reward beads (the beads difference  $< -5$ ), an extra high-  
 302 reward bead would positively update the *VOI*, as it slightly increases the uncertainty on  
 303 the bet, while an extra low-reward bead would negatively update the *VOI*, as it further  
 304 decreases the uncertainty on the bet. The directionality of updating is the opposite when  
 305 more high-reward beads have been observed (the beads difference  $> 0$ ).

306

307 We hypothesized that the right DLPFC tracks the up-to-date *VOI* over time, such that it  
308 responds not only to the *VOI* based on the initial beads but is dynamically updated to  
309 the appropriate updated *VOI* after observation of the extra bead. To test this, we  
310 estimated the effects of the initial *VOI* and *VOI* updating on BOLD signals from the  
311 region of interest (ROI) defined above (Fig. 4B). In order to avoid a strong assumption  
312 about the time course of the updating process, we estimated the effects of initial *VOI*  
313 and *VOI* updating across time using finite impulse response (FIR) functions aligned to  
314 the presentation of the extra bead (Fig 5, top). We included three FIRs in a GLM, one  
315 parametrically modulated with the initial *VOI*, one modulated with the *VOI* updating, and  
316 one without parametric modulation (intercept). Since the ROI was originally defined

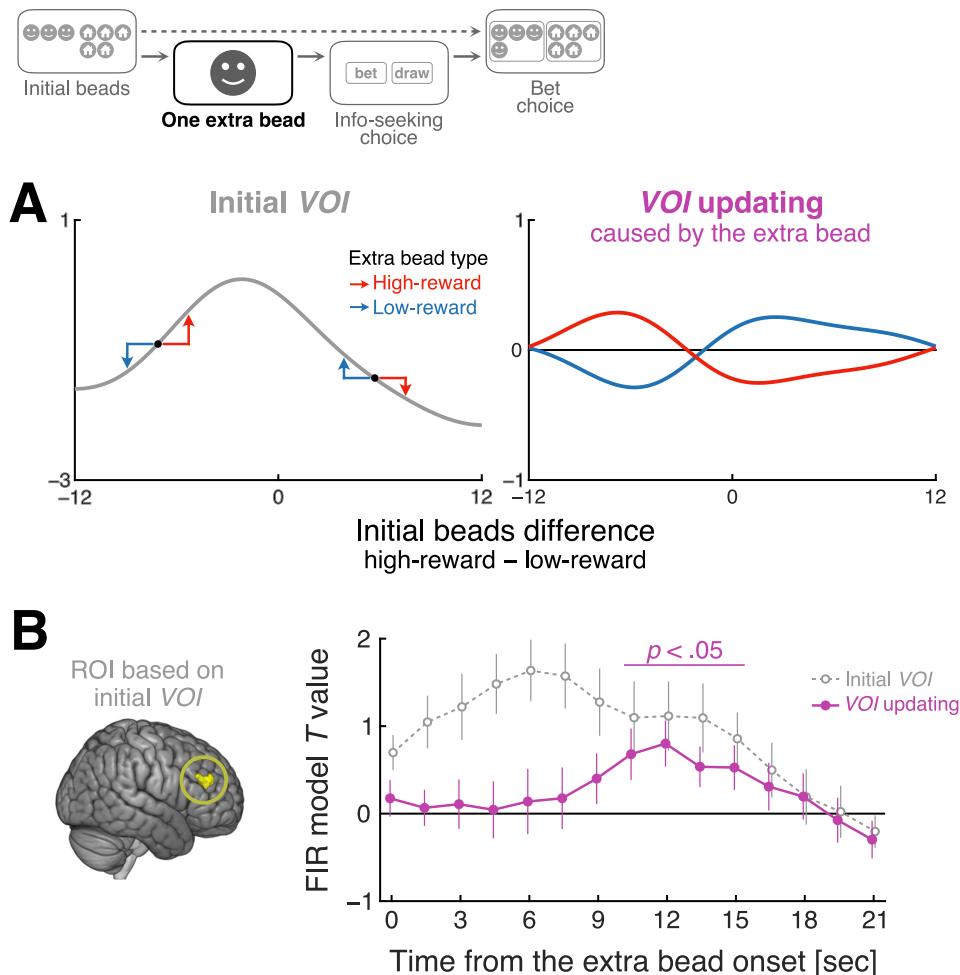

**Fig. 5.** Updating of the *VOI* representation. The right DLPFC tracks *VOI* as it is updated by an extra bead, presented after the initial beads but prior to information seeking. (A) The *VOI* updating was calculated as the signed difference between the *VOI* after the extra bead and the *VOI* before the extra bead. (B) Time courses of the initial *VOI* signal (grey) and the *VOI* updating signal (purple) in the right DLPFC. The right DLPFC responds not only to the initial *VOI* but also to the updating of *VOI* (temporal cluster-mass  $p < .05$ , FWE corrected). Since the region of interest was defined based on the initial *VOI* signal, estimation of the initial *VOI* signal is biased, but estimation of the updating signal is unbiased. Error bars: SEM.

317 based on its response to the initial *VOI* (albeit in an earlier time window), the estimated  
318 effect of the initial *VOI* is biased, but the estimated effect of the *VOI* updating depends  
319 critically on the exact bead that was drawn, and thus is independent of our ROI  
320 selection process (Fig 5A).

321  
322 The estimated time courses are shown in Fig. 5B. As expected, the right DLPFC  
323 represents the initial *VOI* early on. Importantly, the right DLPFC also positively  
324 responded to the *VOI* updating (cluster-forming threshold  $p < .05$ , cluster-mass  $p < .05$ ,  
325 FWE corrected across time). The rise of the *VOI* updating signal lags behind the initial  
326 *VOI* signal in time, but they go back to the baseline in parallel. The estimated time  
327 courses look somewhat sluggish, which presumably reflects the nature of our  
328 experimental paradigm in which participants had several seconds to complete  
329 information seeking.

330  
331 This evidence demonstrates that neural representations in right DLPFC shift from the  
332 initial (*a priori*) *VOI* to the updated (*a posteriori*) *VOI*, suggesting that this brain region  
333 dynamically tracks the *VOI* based on the up-to-date evidence in service of adaptive  
334 information seeking over time.

## 335 Discussion

336  
337 In order to make better decisions, we need to seek information adaptively based on  
338 what we already know (up-to-date decision evidence) and what is at stake (reward  
339 structure). When our knowledge is updated, we need to update the *VOI* accordingly to  
340 decide whether to seek further information. Deficits in updating the *VOI* could lead to  
341 excessive repetition of information seeking even after enough evidence is accumulated  
342 (Hauser et al., 2017), or conversely, premature jumping to conclusions without enough  
343 evidence (Dudley et al., 2016; Ross et al., 2015). Despite its importance and ubiquity in  
344 the real world, we know little about how people evaluate and update the *VOI*. In this  
345 study, we used a variant of the beads task, in which decision evidence was  
346 parametrically manipulated on a trial-by-trial basis, to examine how information seeking  
347 is shaped by current evidence and asymmetric reward structure, and how the *VOI* is  
348 represented and updated in the brain.

349  
350 We theoretically derived, and empirically verified, the normative prediction that  
351 information seeking should be biased by reward asymmetry. Participants were more  
352 likely to seek information when the current evidence preferred the less rewarding state  
353 due to high uncertainty on which state to bet. While the current study used asymmetric  
354 monetary rewards, our theoretical framework can be generalized beyond economic  
355 decision making based on the notion that the people assign intrinsic values to beliefs  
356 that they can hold (Kunda, 1991; Sharot & Garrett, 2016). If people are incentivized to  
357 hold certain beliefs, they will be more motivated to seek information when the current  
358 evidence supports the less desirable belief, even without extrinsic reward asymmetry  
359 (e.g., people check the latest number of COVID-19 cases more often when it is  
360 increasing than decreasing). It is worth noting, however, that the current study only  
361 examined reward structures where a correct bet yields asymmetric rewards but an  
362 incorrect bet does not, while outcomes of an incorrect prediction could also be  
363 asymmetric in some real-world scenarios (e.g., it would be more punishing to  
364 underestimate the chance of COVID-19 transmission and end up causing a  
365 superspreader event than to overestimate it and avoid a social gathering). More  
366 comprehensive, generalizable predictions would be obtained by expanding our findings  
367 to various reward structures.

368  
369 Our theoretical and behavioral findings may provide some insight into confirmation  
370 biases observed across domains. Confirmation bias is commonly framed as biases in  
371 updating processes and/or decision criteria due to reward asymmetry or other factors  
372 such as pre-commitment (Gesiarz et al., 2019; Leong et al., 2019; Luu & Stocker, 2018;  
373 Talluri et al., 2018). We showed that, even without biases in updating or decision  
374 criteria, information seeking should be biased by reward asymmetry. The current study  
375 was not designed to test conventional confirmation bias; our behavioral measure of  
376 information seeking is not sensitive to a bias in updating, and a bias in decision criteria  
377 is not distinguishable from non-neutral risk attitude in our paradigm. Future research  
378 may examine how confirmation bias in updating and/or decision criteria affects

379 information seeking, and conversely, how the information seeking bias would strengthen  
380 or weaken the effects of confirmation bias. Another exciting question for future research  
381 would be whether people exhibit an information-seeking bias upon sampling evidence  
382 from internal representations rather than the external world, such as episodic memory  
383 (Shadlen & Shohamy, 2016).

384  
385 Our finding of the *VOI* representation in DLPFC is consistent with a previous fMRI study  
386 on instrumentality-driven information seeking (Kobayashi & Hsu, 2019), despite a  
387 number of key differences in task design. First, our paradigm required probabilistic  
388 inference on the hidden jar composition based on observable evidence, while  
389 Kobayashi & Hsu (2019) provided explicit and unambiguous visual presentation of  
390 outcome probability. Second, while Kobayashi & Hsu (2019) manipulated the  
391 information's diagnosticity and cost on a trial-by-trial basis, the current paradigm did not  
392 (the participant always drew one bead at a time, which incurred a small constant cost).  
393 Third, and most importantly, unlike Kobayashi & Hsu (2019), the current study  
394 manipulated decision evidence available to the participant at the beginning of each trial  
395 and examined its effect on information-seeking behavior and underlying neural signals.  
396 Thus, the current study not only replicates but also critically extends Kobayashi & Hsu  
397 (2019)'s findings by showing that DLPFC is sensitive to the current evidence and biased  
398 by reward asymmetry, a key theoretical prediction of the instrumentality-driven *VOI*.  
399 Along with neuroimaging evidence that DLPFC is also activated upon information  
400 seeking driven by factors other than instrumentality (Gruber et al., 2014; Kang et al.,  
401 2009; Jepma et al., 2012), these results suggest that DLPFC is critical for adaptive  
402 information seeking across decision contexts and domains.

403  
404 Unlike previous studies, we did not find *VOI* representation in reward regions (e.g.,  
405 striatum or VMPFC) or ACC (Bromberg-Martin & Hikosaka, 2009, 2011; Brydevall et al,  
406 2018; Charpentier et al., 2018; Gruber et al., 2014; Kaanders et al., 2020; Kang et al.,  
407 2009; Krebs et al., 2009; Lau et al., 2020; White et al., 2019). It is possible that we  
408 lacked statistical power to detect signals in these regions; indeed, we found a *VOI*  
409 cluster in anterior insula at a liberal threshold (Fig. S1), which often coactivates with  
410 ACC in task-based and resting-state fMRI (Fox et al., 2005; Menon & Uddin, 2010;  
411 Seeley et al., 2007). Alternatively, the involvement of these regions could depend on  
412 task and decision context. For instance, striatum and/or VMPFC may be more important  
413 when the information-seeking cost is larger and variable, which would demand online  
414 cost-benefit analysis (Lau et al., 2020; Kobayashi & Hsu, 2019). On the other hand,  
415 ACC may be more involved in evaluating uncertainty or conflict in the action space  
416 (Kennerley et al., 2011; Rudebeck et al., 2008; Rushworth & Behrens, 2008; Shenhav  
417 et al., 2016), which is tightly coupled with the *VOI* in many cases, particularly in  
418 situations that involve an exploration-exploitation tradeoff (Kaanders et al., 2020; Kolling  
419 et al., 2012; Shenhav et al., 2014). One possible reason that we did not observe  
420 representation of the *VOI* in ACC, at least at the standard statistical threshold we used,  
421 is that our experimental paradigm decoupled action uncertainty from the *VOI*  
422 computation in three ways: first, information-seeking trials were intermixed with bet-only

423 trials and the participant could not tell the trial type upon the presentation of the initial  
424 evidence (the epoch where we observed the *VOI* representation; Fig. 4); second, the  
425 action uncertainty could not be evaluated until the presentation of the extra bead; and  
426 third, the information-seeking decision was mapped to different actions (left vs. right)  
427 across trials. Further research is needed to understand the extent to which functional  
428 localization of the *VOI* is dependent on task and decision context, and furthermore, how  
429 neural representation of the *VOI* is related to other forms of information seeking,  
430 including exploration and curiosity.

431  
432 Importantly, we showed that DLPFC not only represents the *VOI* based on the initial  
433 evidence but also updates it when additional evidence is supplied, or in other words,  
434 DLPFC tracks the up-to-date *VOI* based on the most recent evidence. Such DLPFC  
435 signals may be critical for adaptive information seeking in situations where the agent  
436 accumulates decision evidence over time, either because it is gradually supplied from  
437 the environment or because the agent sequentially acquires multiple pieces of  
438 information. DLPFC may be well suited for sustained and dynamically updated  
439 representation of the *VOI*, as DLPFC neurons are known to exhibit sustained activity for  
440 working memory retention (Funahashi et al., 1989; Fuster & Alexander, 1971;  
441 Sreenivasan & D'Esposito, 2019). Critically, the *VOI* updating in DLPFC is distinct from  
442 information prediction error (IPE) signals observed in the dopaminergic reward system  
443 and habenula (Blanchard et al., 2015; Bromberg-Martin & Hikosaka, 2009, 2011;  
444 Charpentier et al., 2018); IPE encodes the probabilistic delivery of information itself,  
445 while the *VOI* updating is concerned with how the delivered information increases or  
446 decreases the instrumentality of further information. Exciting open questions for future  
447 research include whether *VOI* signals in DLPFC play a causal role in information-  
448 seeking behavior, and how they are adjusted when evidence acquired in the past  
449 becomes less relevant in a dynamic environment (Behrens et al., 2007; McGuire et al.,  
450 2014; Nassar et al., 2019).

451  
452 Our results may have important implications for information-seeking deficits in clinical  
453 populations. For instance, schizophrenia has been associated with the tendency to  
454 make premature decisions without enough information seeking (Dudley et al., 2016;  
455 Ross et al., 2015; but see Baker et al., 2019), which could be accompanied by DLPFC  
456 hypoactivity (i.e., too low *VOI* signals) (Barch & Ceaser, 2012) and/or the lack of  
457 DLPFC's sensitivity to current decision evidence and reward asymmetry. Similarly, OCD  
458 patients exhibit excessive information seeking (Hauser et al., 2017), which could be  
459 caused by hyperactivity in DLPFC (i.e., too high *VOI* signals) (Eng et al., 2015) and/or  
460 the lack of *VOI* updating in DLPFC. Our experimental and theoretical framework  
461 provides a novel approach to characterization of key components in instrumentality-  
462 driven information seeking, namely the sensitivity to current decision evidence, updating  
463 caused by additional evidence, and a bias due to reward asymmetry, which can be  
464 readily applied in future research with typical and clinical populations.



## 465 **Materials and Methods**

466

467 All procedures were approved by the Institutional Review Board at the University of  
468 Pennsylvania.

469

470 **Participants** 15 people (11 female, 4 male, age: 18-28, mean = 21.27, standard  
471 deviation = 2.79) participated in the experiment. They provided informed consent in  
472 accordance with the Declaration of Helsinki.

473

474 **Task design** We adopted a variant of the beads task (Furl & Averbeck, 2011; Huq et  
475 al., 1988; Phillips & Edwards, 1966); the participant was presented with a jar containing  
476 two types of beads and asked to guess its composition (i.e., which type made up the  
477 majority of the beads) by drawing some beads from the jar (Fig. 1A). Our variant had  
478 three important features. First, the participant was rewarded for identifying the correct  
479 jar composition, but the reward structure was asymmetric, such that the participant  
480 could earn more rewards by correctly betting on one jar type than the other (Fig. 1B).  
481 Second, a variable number of beads was drawn from the jar and presented to the  
482 participant at the beginning of each trial, empirically manipulating the evidence available  
483 to the participant before they seek information. Third, an extra bead was presented on a  
484 subset of trials to update the initial evidence. These features allowed us to examine how  
485 the brain represents and updates the *VOI* based on evidence that changes over time.

486

487 The experiment consisted of two interleaved trial types, bet-only trials and information-  
488 seeking trials (Fig. 1C). In the bet-only trials, the participant was first presented with a  
489 number of beads drawn from the jar. Each bead was depicted as a rounded picture of a  
490 face or a house (one picture for face or house each was used throughout the  
491 experiment). Beads marked with a face were presented to the left and those marked  
492 with a house to the right. The participant was told that these beads were drawn from  
493 one of two jars: a face-majority jar, which consisted of 60% face beads and 40% house  
494 beads, and a house-majority jar, which consisted of 60% house beads and 40% face  
495 beads. Rewards for correct and incorrect bets (in points) were also presented, in green  
496 and gray, respectively. Rewards for a bet on the face-majority jar were shown above the  
497 face beads, and rewards for a bet on the house-majority jar above the house beads.  
498 Rewards for a correct bet on one jar were numerically larger than rewards for a correct  
499 bet on the other jar (reward asymmetry), while an incorrect bet on either jar yielded the  
500 same rewards (Fig. 1B). After the presentation of the initial beads for 3 seconds, the  
501 participant was asked to make a bet. During the bet phase of the task, face and house  
502 beads were separately outlined by magenta boxes, and the participant could press the  
503 left or right button on a response box to bet on the face- or house-majority jar,  
504 respectively. Trials in which the participant did not make a bet within 3 seconds were  
505 terminated and discarded from the analysis.

506

507 In the information-seeking trials, the participant was first presented with the initial beads  
508 screen (same as the bet-only trials), followed by a blank screen (0-2 seconds). Next, an

509 extra bead drawn from the jar was presented, either marked with a face or a house (1  
510 second), which was added to the corresponding group of beads on the initial screen (0-  
511 2 seconds). The participant was then asked to decide whether to draw more beads from  
512 the jar before making a bet on its composition (information-seeking phase). Two choices  
513 appeared on the screen, “draw” and “bet”, and the participant pressed one button to  
514 draw one more bead and another button to terminate the information-seeking phase  
515 and proceed to the bet (the sides of the options were randomized across trials). The  
516 participant was allowed to draw as many beads as they wanted within 5 seconds, and a  
517 face or house bead was added to the screen every time they pressed the “draw” button.  
518 The participant was told that each draw incurred a constant small cost (0.1 points).  
519 Once they pressed the “bet” button (or when 5 seconds have passed), they were  
520 presented with the bet screen (same as the bet-only trials).

521  
522 The task was programmed in Matlab (The MathWorks, Natick, MA) using MGL  
523 (<http://justingardner.net/mgl/>) and SnowDots (<http://code.google.com/p/snow-dots/>)  
524 extensions.

525  
526 **Procedure** In a separate task session before scanning, participants received extensive  
527 training on the task, in which various aspects of the task were gradually introduced  
528 (betting on the jar composition, asymmetric rewards, costly draws, and multiple reward  
529 structures). During the subsequent session, participants completed the task inside the  
530 scanner. Participants made responses using an MRI-compatible button box. They were  
531 compensated based on the total points they acquired in the scanning session (500  
532 points = \$1).

533  
534 The scanning experiment consisted of two blocks, which differed in reward structure  
535 (Fig. 1B). In the first block (the baseline block), one of the two reward structures,  
536  $(R_H, R_L, R_I) = (70, 10, 0)$  or  $(170, 110, 100)$ , was randomly presented in each trial,  
537 where  $R_H$  is the reward for a correct bet on the high-reward jar,  $R_L$  is the reward for a  
538 correct bet on the low-reward jar, and  $R_I$  is the reward for an incorrect bet; thus, the  
539 participant earned a baseline reward of 100 points irrespective of their bet in half of the  
540 trials. In the second block (the scale block), one of the two reward structures,  $(R_H, R_L, R_I)$   
541  $= (70, 10, 0)$  or  $(7, 1, 0)$ , was randomly presented in each trial; thus, the participant  
542 earned a tenth of the rewards in half of the trials. Each block consisted of two scanning  
543 runs, one where the high-reward jar was the face-majority jar and one where the high-  
544 reward jar was the house-majority jar; their order was counterbalanced across  
545 participants.

546  
547 On each trial, the participant was presented with 20 or 30 initial beads from the jar. The  
548 difference in the number of initial beads marked with a face or house was uniformly  
549 sampled from a discrete set of values ranging from -10 to 10 in increments of 2.  
550 Unbeknownst to the participant, the true jar type was stochastically determined following  
551 the Bayesian posterior conditional on the initial beads difference (see Eq. 1 below). In  
552 the information-seeking trials, the type of the extra bead presented and of all additional

553 beads drawn by the participant (face or house) were stochastically determined based on  
 554 the hidden jar type. The participant was not provided with feedback on their bet  
 555 accuracy or rewards on a trial-by-trial basis. They were however informed of the total  
 556 number of points they had accumulated at the end of each run.

557  
 558 **Theory** Normative predictions about the *VOI*, or how much an optimal agent should pay  
 559 for information, were derived under assumptions that the agent conducts full-Bayesian  
 560 inference on the jar type, deterministically makes an optimal choice to maximize the  
 561 expected value (*EV*), is risk neutral, and optimally seeks information based on its  
 562 instrumentality, or how much it would improve the *EV* of the subsequent bet choice. Our  
 563 theoretical framework did not consider any additional information-seeking motives, such  
 564 as curiosity, savoring, dread, or uncertainty reduction.

565  
 566 Let  $s_H$  be the state where the true jar is the high-reward jar and  $s_L$  the state where it is  
 567 the low-reward jar. Let  $a_H$  be the action to bet on  $s_H$  and  $a_L$  the action to bet on  $s_L$ . Let  
 568 us further refer to the majority beads in the high-reward jar as high-reward beads and  
 569 the majority beads in the low-reward jar as low-reward beads (for instance, if the high-  
 570 reward jar is the house-majority jar, a house bead is a high-reward bead and a face  
 571 bead is a low-reward bead; note that the beads were not directly associated with  
 572 rewards per se). The goal for the agent is to choose between  $a_H$  and  $a_L$  to maximize *EV*  
 573 given the current evidence (i.e., the number of high-reward beads  $n_H$  and low-reward  
 574 beads  $n_L$  drawn from the jar so far) and the reward structure ( $R_H, R_L, R_I$ ).

575  
 576 The likelihood of drawing a high-reward bead  $b_H$  or a low-reward bead  $b_L$  conditional on  
 577 the jar type is known to the agent:

$$578 \quad \begin{aligned} P(b_H|s_H) &= P(b_L|s_L) = q \\ P(b_L|s_H) &= P(b_H|s_L) = 1 - q \end{aligned}$$

581  
 582 where  $q = 0.6$ . Assuming that the agent has a flat prior on the jar type ( $P(s_H) =$   
 583  $P(s_L) = 0.5$ ), the posterior follows

$$584 \quad \frac{P(s_H|n_H, n_L)}{P(s_L|n_H, n_L)} = \frac{P(n_H, n_L|s_H)P(s_H)}{P(n_H, n_L|s_L)P(s_L)} = \frac{\binom{n_H+n_L}{n_H} P(b_H|s_H)^{n_H} P(b_L|s_H)^{n_L}}{\binom{n_H+n_L}{n_L} P(b_H|s_L)^{n_H} P(b_L|s_L)^{n_L}} = \left(\frac{q}{1-q}\right)^{n_H-n_L}$$

586  
 587 therefore

$$588 \quad P(s_H|n_H, n_L) = 1 - P(s_L|n_H, n_L) = \frac{\left(\frac{q}{1-q}\right)^{n_H-n_L}}{\left(\frac{q}{1-q}\right)^{n_H-n_L} + 1} \quad (1)$$

590  
 591 which is a function of the beads difference,  $n_H - n_L$  (e.g., the posterior is the same  
 592 when  $(n_H, n_L) = (5, 2)$  or  $(15, 12)$ ) (Fig. 2a, b).

593

594 Given the posterior, the agent makes a choice among three options: to bet on  $s_H$ , to bet  
 595 on  $s_L$ , or to seek information and draw an additional bead from the jar, which incurs a  
 596 cost  $c_{\text{draw}}$  (0.1 points). The agent should decide whether to draw an additional bead  
 597 based on the  $VOI$ , or the improvement in the bet's  $EV$  thanks to the next bead:

598

$$599 \quad VOI(n_H, n_L) = EV_{\text{draw}}(n_H, n_L) - EV_{\text{bet}}(n_H, n_L) \quad (2)$$

600

601 where  $EV_{\text{draw}}$  is the highest  $EV$  that the agent could achieve after drawing the next bead  
 602 (without considering the information-seeking cost), and  $EV_{\text{bet}}$  is the highest  $EV$  that the  
 603 agent could achieve by making a bet without any further information. The agent should  
 604 draw a bead if and only if the  $VOI$  is higher than the drawing cost  $c_{\text{draw}}$ .

605

606  $EV_{\text{bet}}$  is the higher of the two bet  $EV$ s based on the current evidence, namely

607

$$608 \quad EV_{\text{bet}}(n_H, n_L) = \max_a EV(a|n_H, n_L)$$

609

610 where  $a \in \{a_H, a_L\}$  and

611

$$612 \quad EV(a_H|n_H, n_L) = R_H \cdot P(s_H|n_H, n_L) + R_I \cdot P(s_L|n_H, n_L)$$

$$613 \quad EV(a_L|n_H, n_L) = R_L \cdot P(s_L|n_H, n_L) + R_I \cdot P(s_H|n_H, n_L)$$

614

615 Since the posterior is determined by the beads difference (Eq. 1), the bet  $EV$ s are also  
 616 determined by the beads difference.

617

618 In order to evaluate  $EV_{\text{draw}}$ , we have to take into account two important facets of our  
 619 information-seeking paradigm: first, the content of information (the type of the next  
 620 bead,  $b_H$  or  $b_L$ ) is stochastic, and second, the agent can decide whether to draw yet  
 621 another bead or not after observing the next bead. Therefore, we have to evaluate the  
 622 likelihood of the next bead type and combine it with the  $EV$  of an optimal choice  
 623 conditional on each bead type. The likelihood of the next bead type based on the  
 624 current evidence is evaluated according to the posterior on the jar type:

625

$$626 \quad P(b_H|n_H, n_L) = P(b_H|s_H)P(s_H|n_H, n_L) + P(b_H|s_L)P(s_L|n_H, n_L)$$

$$627 \quad P(b_L|n_H, n_L) = P(b_L|s_H)P(s_H|n_H, n_L) + P(b_L|s_L)P(s_L|n_H, n_L)$$

628

629 If the next bead is  $b_H$ , it would update the evidence from  $(n_H, n_L)$  to  $(n_H + 1, n_L)$ . Then  
 630 the agent can either make an optimal bet and achieve  $EV_{\text{bet}}(n_H + 1, n_L)$  or pay the cost  
 631 to draw another bead and achieve  $EV_{\text{draw}}(n_H + 1, n_L) - c_{\text{draw}}$ . Similarly, if the next bead  
 632 is  $b_L$ , it would update the evidence to  $(n_H, n_L + 1)$ , based on which the agent can either  
 633 make an optimal bet and achieve  $EV_{\text{bet}}(n_H, n_L + 1)$  or draw another bead and achieve  
 634  $EV_{\text{draw}}(n_H, n_L + 1) - c_{\text{draw}}$ . Therefore, the highest  $EV$  that the agent can achieve after  
 635 drawing an additional bead is

636

$$EV_{\text{draw}}(n_H, n_L) = P(b_H | n_H, n_L) \cdot \max[EV_{\text{bet}}(n_H + 1, n_L), EV_{\text{draw}}(n_H + 1, n_L) - c_{\text{draw}}] + P(b_L | n_H, n_L) \cdot \max[EV_{\text{bet}}(n_H, n_L + 1), EV_{\text{draw}}(n_H, n_L + 1) - c_{\text{draw}}] \quad (3)$$

In Eq. 3,  $EV_{\text{draw}}(n_H, n_L)$  in the left-hand side depends on  $EV_{\text{draw}}(n_H + 1, n_L)$  and  $EV_{\text{draw}}(n_H, n_L + 1)$  in the right-hand side due to the aforementioned sequentiality of information seeking. We thus solved Eq. 3 by backward recursion. Specifically, we arbitrarily assumed that the agent cannot draw more than 200 beads, set  $EV_{\text{draw}}(n_H, n_L) = 0$  where  $n_H + n_L = 200$ , and used Eq. 3 to obtain  $EV_{\text{draw}}(n_H, n_L)$  where  $n_H + n_L = 199$ . We then used Eq. 3 recursively to obtain  $EV_{\text{draw}}(n_H, n_L)$  for all cases where  $0 < n_H + n_L < 200$ . Although the obtained  $EV_{\text{draw}}(n_H, n_L)$  depends on  $n_H + n_L$ , it reaches an asymptote over the course of recursion quickly (Fig. S2). We substituted the asymptotic  $EV_{\text{draw}}$  to Eq. 2 and obtained the theoretical  $VOI$  as a function of the beads difference.

The  $VOI$  obtained for each of the three reward structures,  $(R_H, R_L, R_I) = (70, 10, 0)$ ,  $(170, 110, 100)$ , and  $(7, 1, 0)$ , is shown in Fig. 2F. The baseline shift affects both  $EV_{\text{draw}}$  and  $EV_{\text{bet}}$  by the same amount, which is canceled out in Eq. 2 and does not affect the  $VOI$ . On the other hand, since  $c_{\text{draw}}$  was not scaled along with rewards and remained the same across conditions (0.1 points), the scale manipulation affects not only the magnitude but also shape of  $EV_{\text{draw}}$  (Eq. 3) and thus the  $VOI$  (Eq. 2).

The most important prediction of this theoretical framework is that *information seeking should be biased due to the reward asymmetry*. The  $VOI$  takes an inverted- $U$  shape as a function of the beads difference, and its peak is at a moderate negative beads difference ( $n_H - n_L = -5$ ). This is because the information would directly improve the subsequent bet choice; when  $n_H - n_L = -5$ ,  $EV(a_H | n_H, n_L)$  is close to  $EV(a_L | n_H, n_L)$ , but the next bead would increase their difference in either direction (if a high-reward bead  $b_H$  is observed,  $EV(a_H | n_H + 1, n_L) > EV(a_L | n_H + 1, n_L)$ ; if a low-reward bead  $b_L$  is observed,  $EV(a_H | n_H, n_L + 1) < EV(a_L | n_H, n_L + 1)$ ). Therefore, the agent can bet on  $s_H$  after  $b_H$  and bet on  $s_L$  after  $b_L$ , and such flexibility improves the overall  $EV$ . In contrast, the  $VOI$  is effectively zero when the beads difference is positive ( $n_H - n_L > 0$ ), because the agent would bet on  $s_H$  irrespective of the next draw. The  $VOI$  is also effectively zero when low-reward beads outnumber high-reward beads by a large enough margin ( $n_H - n_L < -7$ ), because the agent would bet on  $s_L$  irrespective of the next draw.

This qualitative prediction, a bias in information seeking towards a negative beads difference, does not depend on most of our assumptions (e.g., choice optimality, risk neutrality). Information seeking would be biased *as far as the agent is sensitive to the rank order of rewards and the bead difference*. On the other hand, if an agent is not motivated to maximize rewards but to maximize the accuracy of the prediction (i.e., their utility function  $U$  follows  $U(R_H) = U(R_L) > U(R_I)$ ), they would exhibit unbiased information seeking; the uncertainty about the jar type is determined by  $|n_H - n_L|$  and is highest when  $n_H = n_L$ , which is when the agent would draw beads most frequently. Therefore, a bias in information seeking would suggest that information seeking is

680 motivated by information's instrumentality for future reward seeking.

681  
682 **Behavioral data analysis** In order to examine information-seeking behavior, we  
683 analyzed the frequency at which participants drew at least one bead as a function of the  
684 beads difference. We specifically focused on whether they drew the first bead as a  
685 function of the current evidence and examined if it was biased by the reward asymmetry  
686 as theoretically predicted. The relationship between information-seeking behavior and  
687 the beads difference was analyzed using Gaussian Process (GP) logistic regression  
688 (Rasmussen & Williams, 2006). GP logistic regression estimates a latent function that  
689 smoothly varies with the independent variable (the beads difference) and yields  
690 likelihoods of binary choices (whether participants drew a bead in each trial), and the  
691 estimated latent function can be interpreted as the subjective *VOI* function (the higher  
692 *VOI* is, the more likely participants draw a bead). The latent function with isotropic  
693 squared exponential covariance was estimated using Variational Bayes approximation,  
694 as implemented in Gaussian Processes for Machine Learning toolbox, version 4.2  
695 (<https://github.com/alshedivat/gpml>) (Rasmussen & Nickisch, 2010).

696  
697 To test whether information-seeking behavior systematically differed across blocks and  
698 reward conditions within each block, we compared four models. Model 1 implemented  
699 the theoretical prescription that information seeking is sensitive to the scale  
700 manipulation but not to the baseline manipulation. It thus consisted of three separate  
701 latent value functions, one used in all trials in the baseline block, one used in trials  
702 where  $(R_H, R_L, R_I) = (70, 10, 0)$  in the scale block, and one used in trials where  
703  $(R_H, R_L, R_I) = (7, 1, 0)$  in the scale block. We constructed several alternative models.  
704 Model 2 postulated different value functions for reward conditions not only in the scale  
705 block but also in the baseline block, one for trials where  $(R_H, R_L, R_I) = (70, 10, 0)$  and  
706 another for trials where  $(R_H, R_L, R_I) = (170, 110, 0)$  (i.e., four value functions in total);  
707 Model 3 postulated the lack of sensitivity to reward conditions in both blocks but a  
708 separate value function for each block (i.e., two value functions in total); and Model 4  
709 postulated one common value function for all trials in both blocks. These models were  
710 compared based on leave-one-participant-out cross validation (LOPO CV) and leave-  
711 one-trial-out cross validation (LOTO CV). We also adopted the same analytic approach  
712 to the bet choices, comparing the performance of Models 1-4.

713  
714 We found that Model 3 outperformed other models for both information-seeking and bet  
715 choices (see Results). To test whether information-seeking behavior was biased by the  
716 reward asymmetry, we next compared Model 3 with another model (Model 5) that  
717 assumed value functions that are symmetric with respect to the beads difference (i.e.,  
718 value functions that only vary with the absolute value of beads difference). We found  
719 that Model 3 fit information-seeking behavior better than Model 5, supporting a bias in  
720 information seeking (see Results).

721  
722 The fact that Model 3 performed better than Models 1, 2, and 4 suggests that, while  
723 participants did not change their behavioral strategies based on the trial-by-trial reward

724 manipulation, they adapted to the different reward statistics across blocks. However,  
725 such changes across blocks could potentially reflect time-induced behavioral changes  
726 as well, such as boredom or fatigue, since all participants completed the baseline block  
727 first and the scale block second. To examine the possibility that the population-level  
728 behavioral pattern was not stationary over time, we tested another model (Model 6) that  
729 assumed distinct value functions between the first and second scanning runs within  
730 each block (one value function for each run, four functions in total). Model 6 performed  
731 worse than Model 3 (information-seeking choices: LOPO CV log likelihood [LL] =  
732  $-1222.05$  vs.  $-1214.73$ , LOTO CV LL =  $-1145.39$  vs.  $-1142.25$ , bet choices: LOPO CV  
733 =  $-288.55$  vs.  $-283.56$ , LOTO CV LL =  $-266.00$  vs.  $-265.26$ ), suggesting that changes  
734 in participants' behavior were systematically driven by reward statistics rather than time.

735  
736 **MRI data acquisition** MRI data was collected using a Siemens (Erlangen, Germany)  
737 Trio 3T scanner with a 32-channel head coil at the University of Pennsylvania. A 3D  
738 high-resolution anatomical image was acquired using a T1-weighted MPRAGE  
739 sequence (voxel size =  $0.9375 \times 0.9375 \times 1$  mm, matrix size =  $192 \times 256$ , 160 axial  
740 slices, TI = 1100 msec, TR = 1810 msec, TE = 3.51 msec, flip angle = 9 degrees).  
741 Functional images were acquired using a T2\*-weighted multiband gradient echoplanar  
742 imaging (EPI) sequence (voxel size =  $2 \times 2 \times 2$  mm, matrix size =  $98 \times 98$ , 72 axial  
743 slices with no interslice gap, 400 volumes, TR = 1500 msec, TE = 30 msec, flip angle =  
744 45 degrees, multiband factor = 4), followed by Fieldmap images (TR = 1270 msec, TEs  
745 = 5 msec and 7.46 msec, flip angle = 60 degrees).

746  
747 **MRI data analysis** MRI data were analyzed using FSL (FMRIB Software Library,  
748 version 6.0) (Jenkinson et al., 2012; Smith et al., 2004). MPRAGE anatomical images  
749 were skull-stripped using FSL BET. EPI functional images were slice-time corrected,  
750 motion corrected (FSL MCFLIRT), high-pass filtered (cutoff = 90 sec), geometrically  
751 undistorted using Fieldmap images, registered to the MPRAGE anatomical image,  
752 normalized to the MNI space, and spatially smoothed (Gaussian kernel FWHM = 6 mm).

753  
754 To look for regions that represent the subjective *VOI* upon the initial beads presentation,  
755 we ran a GLM analysis (GLM 1). The regressor of interest modeled the initial beads  
756 presentation (3-second boxcar) and was parametrically modulated by the trial-by-trial  
757 subjective *VOI*, which was the latent function estimated in the winning model (Model 3)  
758 of GP logistic regression on the information-seeking behavior. GLM 1 also included  
759 nuisance regressors that modeled the initial beads presentation (unmodulated), the  
760 extra bead presentation, and button presses. The regressors were convolved with the  
761 canonical double-gamma hemodynamic response function (HRF). GLM 1 additionally  
762 incorporated six head motion parameters (3 translations and 3 rotations, estimated by  
763 MCFLIRT) as confound regressors. GLM 1 was run following the standard approach of  
764 FSL FEAT; the GLM was first fit to BOLD signals in each run (first level) and the  
765 estimated coefficients of interest were combined across runs (second level). Individual-  
766 level *T*-statistics were entered into the population-level inference using FSL randomise,  
767 in which clusters that showed positive response to subjective *VOI* were defined at the

768 voxel-wise cluster-forming threshold of  $p < .001$  and evaluated by sign-flipping  
769 permutation on cluster mass. A cluster that survived whole-brain family-wise error  
770 (FWE) corrected  $p < .05$  is reported in Fig. 3B; another cluster that survived a more  
771 lenient threshold ( $p < .10$ ) is reported in Fig. S1.

772

773 To illustrate how the cluster's activation varied as a function of the beads difference, we  
774 ran another GLM (GLM 2) using FSL FEAT, which included a regressor for each level of  
775 beads difference separately, along with the same nuisance regressors as GLM 1.  $T$ -  
776 statistics for each regressor of interest were then averaged across runs within each  
777 block and then averaged across all voxels in the right DLPFC cluster defined as above  
778 (Fig. 3B).

779

780 Lastly, to examine how the DLPFC responds to the updating of  $VOI$ , we ran another  
781 GLM (GLM 3) using FSL FEAT to estimate the time course of signals related to the  
782 initial  $VOI$  and the  $VOI$  updating, which were derived from Model 3 of GP logistic  
783 regression. The  $VOI$  updating was calculated as the signed difference between the  
784 posterior  $VOI$ , which depends both on the initial beads and the extra bead, and the prior  
785  $VOI$ , which depends only on the initial beads (Fig. 4A). GLM 3 included three sets of  
786 finite impulse response (FIR) function, one unmodulated (intercept), one parametrically  
787 modulated by the initial  $VOI$ , and one parametrically modulated by the  $VOI$  updating.  
788 These FIRs were aligned to the onset of the extra bead and sampled every 1.5 seconds  
789 (equal to TR) for the total duration of 21 seconds. GLM 3 also included nuisance  
790 regressors that modeled the initial beads presentation and button presses, convolved  
791 with the canonical HRF, along with head motion parameters.  $T$ -statistics of  
792 parametrically modulated FIR sets were averaged across all voxels in the right DLPFC  
793 cluster for each participant. Population-level inference on the updating signal was  
794 conducted at the cluster level across time; clusters were defined at the event-wise  
795 cluster-forming threshold of  $p < .05$  and evaluated by sign-flipping permutation on  
796 cluster mass, correcting for FWE across time.



## Supplementary Figures

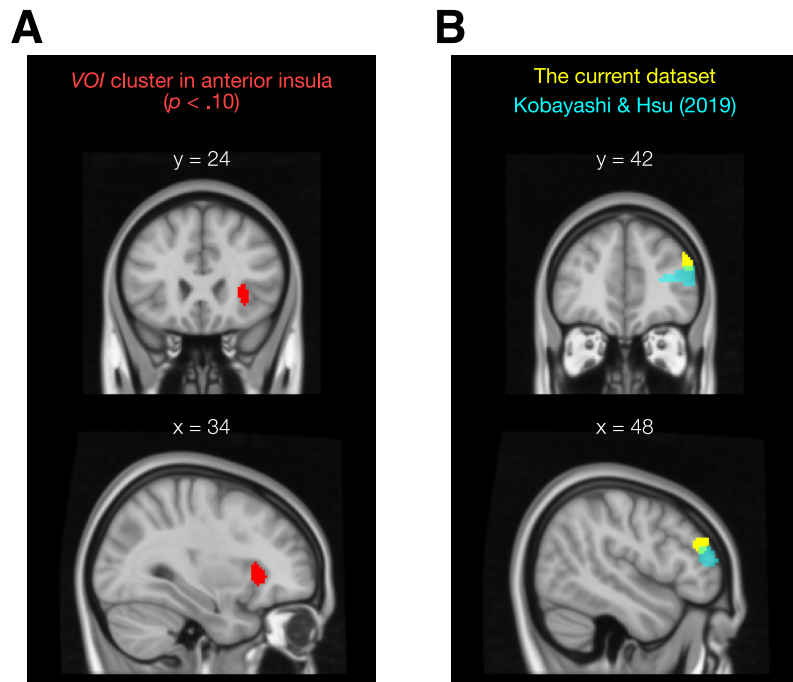

**Fig. S1.** (A) At a liberal threshold (cluster-forming threshold  $p < .001$ , cluster mass  $p < .10$ , corrected for whole-brain FWE), the subjective *VOI* was positively associated with activations in right anterior insula. (B) The DLPFC cluster identified in the current dataset (Fig. 4b) overlaps with a subjective *VOI* cluster reported in Kobayashi & Hsu (2019).

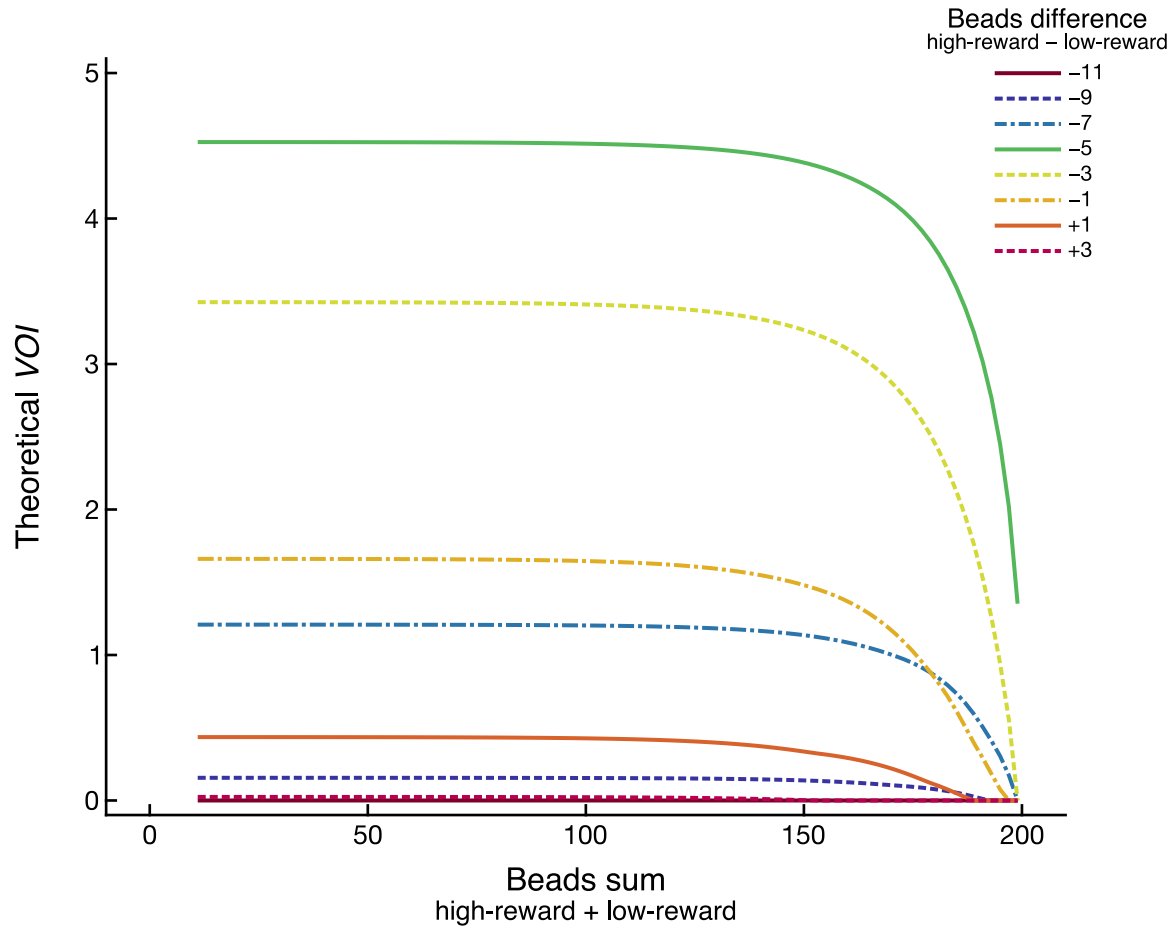

**Fig. S2.** The theoretical *VOI* was numerically estimated by backward recursion (up to 200 steps). The *VOI* reached an asymptote at each level of beads difference over the course of recursion. Moreover, the *VOI* was highest with a negative beads difference (-5) throughout recursion.

## References

- Baker, S. C., Konova, A. B., Daw, N. D., & Horga, G. (2019). A distinct inferential mechanism for delusions in schizophrenia. *Brain*, *142*(6), 1797–1812. <https://doi.org/10.1093/brain/awz051>
- Barch, D. M., & Ceaser, A. (2012). Cognition in schizophrenia: core psychological and neural mechanisms. *Trends in Cognitive Sciences*, *16*(1), 27–34. <https://doi.org/10.1016/j.tics.2011.11.015>
- Behrens, T. E. J., Woolrich, M. W., Walton, M. E., & Rushworth, M. F. S. (2007). Learning the value of information in an uncertain world. *Nature Neuroscience*, *10*(9), 1214–1221. <https://doi.org/10.1038/nn1954>
- Blanchard, T. C., Hayden, B. Y., & Bromberg-Martin, E. S. (2015). Orbitofrontal cortex uses distinct codes for different choice attributes in decisions motivated by curiosity. *Neuron*, *85*(3), 602–614. <https://doi.org/10.1016/j.neuron.2014.12.050>
- Bromberg-Martin, E. S., & Hikosaka, O. (2009). Midbrain dopamine neurons signal preference for advance information about upcoming rewards. *Neuron*, *63*(1), 119–126. <https://doi.org/10.1016/j.neuron.2009.06.009>
- Bromberg-Martin, E. S., & Hikosaka, O. (2011). Lateral habenula neurons signal errors in the prediction of reward information. *Nature Neuroscience*, *14*(9), 1209–1216. <https://doi.org/10.1038/nn.2902>
- Brydevall, M., Bennett, D., Murawski, C., & Bode, S. (2018). The neural encoding of information prediction errors during non-instrumental information seeking. *Scientific Reports*, *8*(1), 6134. <https://doi.org/10.1038/s41598-018-24566-x>
- Caplin, A., & Leahy, J. (2001). Psychological expected utility theory and anticipatory feelings. *The Quarterly Journal of Economics*, *116*(1), 55–79. <https://doi.org/10.1162/003355301556347>
- Charpentier, C. J., Bromberg-Martin, E. S., & Sharot, T. (2018). Valuation of knowledge and ignorance in mesolimbic reward circuitry. *Proceedings of the National Academy of Sciences of the United States of America*, *115*(31), E7255–E7264. <https://doi.org/10.1073/pnas.1800547115>
- Dudley, R., Taylor, P., Wickham, S., & Hutton, P. (2016). Psychosis, Delusions and the “Jumping to Conclusions” Reasoning Bias: A Systematic Review and Meta-analysis. *Schizophrenia Bulletin*, *42*(3), 652–665. <https://doi.org/10.1093/schbul/sbv150>
- Edwards, W. (1965). Optimal strategies for seeking information: Models for statistics, choice reaction times, and human information processing. *Journal of Mathematical Psychology*, *2*(2), 312–329. [https://doi.org/10.1016/0022-2496\(65\)90007-6](https://doi.org/10.1016/0022-2496(65)90007-6)
- Edwards, W., & Slovic, P. (1965). Seeking Information to Reduce the Risk of Decisions. *The American Journal of Psychology*, *78*(2), 188–197.
- Eng, G. K., Sim, K., & Chen, S.-H. A. (2015). Meta-analytic investigations of structural grey matter, executive domain-related functional activations, and white matter diffusivity in obsessive compulsive disorder: An integrative review. *Neuroscience & Biobehavioral Reviews*, *52*, 233–257. <https://doi.org/10.1016/j.neubiorev.2015.03.002>

- Fox, M. D., Snyder, A. Z., Vincent, J. L., Corbetta, M., Essen, D. C. V., & Raichle, M. E. (2005). The human brain is intrinsically organized into dynamic, anticorrelated functional networks. *Proceedings of the National Academy of Sciences of the United States of America*, *102*(27), 9673–9678. <https://doi.org/10.1073/pnas.0504136102>
- Funahashi, S., Bruce, C. J., & Goldman-Rakic, P. S. (1989). Mnemonic coding of visual space in the monkey's dorsolateral prefrontal cortex. *Journal of Neurophysiology*, *61*(2), 331–349.
- Furl, N., & Averbeck, B. B. (2011). Parietal Cortex and Insula Relate to Evidence Seeking Relevant to Reward-Related Decisions. *The Journal of Neuroscience*, *31*(48), 17572–17582. <https://doi.org/10.1523/jneurosci.4236-11.2011>
- Fuster, J. M., & Alexander, G. E. (1971). Neuron Activity Related to Short-Term Memory. *Science*, *173*(3997), 652–654. <https://doi.org/10.1126/science.173.3997.652>
- Gesiarz, F., Cahill, D., & Sharot, T. (2019). Evidence accumulation is biased by motivation: A computational account. *PLOS Computational Biology*, *15*(6), e1007089. <https://doi.org/10.1371/journal.pcbi.1007089>
- Gottlieb, J., & Oudeyer, P.-Y. (2018). Towards a neuroscience of active sampling and curiosity. *Nature Reviews Neuroscience*, *19*(12), 758–770. <https://doi.org/10.1038/s41583-018-0078-0>
- Gruber, M. J., Gelman, B. D., & Ranganath, C. (2014). States of curiosity modulate hippocampus-dependent learning via the dopaminergic circuit. *Neuron*, *84*(2), 486–496. <https://doi.org/10.1016/j.neuron.2014.08.060>
- Hauser, T. U., Moutoussis, M., Consortium, N., Dayan, P., & Dolan, R. J. (2017). Increased decision thresholds trigger extended information gathering across the compulsivity spectrum. *Translational Psychiatry*, *7*(12), 1296. <https://doi.org/10.1038/s41398-017-0040-3>
- Howard, R. A. (1966). Information value theory. *IEEE Transactions on Systems Science and Cybernetics*, *2*(1), 22–26. <https://doi.org/10.1109/tssc.1966.300074>
- Huq, S. F., Garety, P. A., & Hemsley, D. R. (1988). Probabilistic Judgements in Deluded and Non-Deluded Subjects. *Quarterly Journal of Experimental Psychology*, *40*(4), 801–812. <https://doi.org/10.1080/14640748808402300>
- Jenkinson, M., Beckmann, C. F., Behrens, T. E. J., Woolrich, M. W., & Smith, S. M. (2012). FSL. *NeuroImage*, *62*(2), 782–790. <https://doi.org/10.1016/j.neuroimage.2011.09.015>
- Jepma, M., Verdonschot, R. G., Steenbergen, H. van, Rombouts, S. A. R. B., & Nieuwenhuis, S. (2012). Neural mechanisms underlying the induction and relief of perceptual curiosity. *Frontiers in Behavioral Neuroscience*, *6*, 5. <https://doi.org/10.3389/fnbeh.2012.00005>
- Kaanders, P., Nili, H., O'Reilly, J. X., & Hunt, L. T. (2020). Medial frontal cortex activity predicts information sampling in economic choice. *BioRxiv*. <https://doi.org/10.1101/2020.11.24.395814>
- Kakade, S., & Dayan, P. (2002). Dopamine: generalization and bonuses. *Neural Networks*, *15*(4–6), 549–559. [https://doi.org/10.1016/s0893-6080\(02\)00048-5](https://doi.org/10.1016/s0893-6080(02)00048-5)

- Kang, M. J., Hsu, M., Krajbich, I. M., Loewenstein, G., McClure, S. M., Wang, J. T., & Camerer, C. F. (2009). The wick in the candle of learning: Epistemic curiosity activates reward circuitry and enhances memory. *Psychological Science*, *20*(8), 963–973. <https://doi.org/10.1111/j.1467-9280.2009.02402.x>
- Kennerley, S. W., Behrens, T. E. J., & Wallis, J. D. (2011). Double dissociation of value computations in orbitofrontal and anterior cingulate neurons. *Nature Neuroscience*, *14*(12), 1581–1589. <https://doi.org/10.1038/nn.2961>
- Kidd, C., & Hayden, B. Y. (2015). The psychology and neuroscience of curiosity. *Neuron*, *88*(3), 449–460. <https://doi.org/10.1016/j.neuron.2015.09.010>
- Kobayashi, K., & Hsu, M. (2019). Common neural code for reward and information value. *Proceedings of the National Academy of Sciences of the United States of America*, *116*(26), 13061–13066. <https://doi.org/10.1073/pnas.1820145116>
- Kobayashi, K., Ravaoli, S., Baranès, A., Woodford, M., & Gottlieb, J. (2019). Diverse motives for human curiosity. *Nature Human Behaviour*, *3*(6), 587–595. <https://doi.org/10.1038/s41562-019-0589-3>
- Kolling, N., Behrens, T. E. J., Mars, R. B., & Rushworth, M. F. S. (2012). Neural Mechanisms of Foraging. *Science*, *336*(6077), 95–98. <https://doi.org/10.1126/science.1216930>
- Krebs, R. M., Schott, B. H., Schütze, H., & Düzel, E. (2009). The novelty exploration bonus and its attentional modulation. *Neuropsychologia*, *47*(11), 2272–2281. <https://doi.org/10.1016/j.neuropsychologia.2009.01.015>
- Kreps, D. M., & Porteus, E. L. (1978). Temporal resolution of uncertainty and dynamic choice theory. *Econometrica*, *46*(1), 185–200. <https://doi.org/10.2307/1913656>
- Kunda, Z. (1991). The case for motivated reasoning. *Psychological Bulletin*, *108*(3), 480–498. <https://doi.org/10.1037/0033-2909.108.3.480>
- Lau, J. K. L., Ozono, H., Kuratomi, K., Komiya, A., & Murayama, K. (2020). Shared striatal activity in decisions to satisfy curiosity and hunger at the risk of electric shocks. *Nature Human Behaviour*, *4*(5), 531–543. <https://doi.org/10.1038/s41562-020-0848-3>
- Leong, Y. C., Hughes, B. L., Wang, Y., & Zaki, J. (2019). Neurocomputational mechanisms underlying motivated seeing. *Nature Human Behaviour*, *3*(42), 962–973. <https://doi.org/10.1038/s41562-019-0637-z>
- Loewenstein, G. (1994). The psychology of curiosity: A review and reinterpretation. *Psychological Bulletin*, *116*(1), 75–98. <https://doi.org/10.1037/0033-2909.116.1.75>
- Luu, L., & Stocker, A. A. (2018). Post-decision biases reveal a self-consistency principle in perceptual inference. *ELife*, *7*, E3548. <https://doi.org/10.7554/elife.33334>
- McGuire, J. T., Nassar, M. R., Gold, J. I., & Kable, J. W. (2014). Functionally Dissociable Influences on Learning Rate in a Dynamic Environment. *Neuron*, *84*(4), 870–881. <https://doi.org/10.1016/j.neuron.2014.10.013>

- Menon, V., & Uddin, L. Q. (2010). Saliency, switching, attention and control: a network model of insula function. *Brain Structure and Function*, *214*(5–6), 655–667. <https://doi.org/10.1007/s00429-010-0262-0>
- Nassar, M. R., McGuire, J. T., Ritz, H., & Kable, J. W. (2019). Dissociable Forms of Uncertainty-Driven Representational Change Across the Human Brain. *Journal of Neuroscience*, *39*(9), 1688–1698. <https://doi.org/10.1523/jneurosci.1713-18.2018>
- Phillips, L. D., & Edwards, W. (1966). Conservatism in a simple probability inference task. *Journal of Experimental Psychology*, *72*(3), 346–354. <https://doi.org/10.1037/h0023653>
- Rasmussen, C. E., & Nickisch, H. (2010). Gaussian Processes for Machine Learning (GPML) Toolbox. *Journal of Machine Learning Research*, *11*(100), 3011–3015.
- Rasmussen, C. E., & Williams, C. K. I. (2006). *Gaussian Processes for Machine Learning*. The MIT press. <https://doi.org/10.7551/mitpress/3206.001.0001>
- Ross, R. M., McKay, R., Coltheart, M., & Langdon, R. (2015). Jumping to Conclusions About the Beads Task? A Meta-analysis of Delusional Ideation and Data-Gathering. *Schizophrenia Bulletin*, *41*(5), 1183–1191. <https://doi.org/10.1093/schbul/sbu187>
- Rudebeck, P. H., Behrens, T. E., Kennerley, S. W., Baxter, M. G., Buckley, M. J., Walton, M. E., & Rushworth, M. F. S. (2008). Frontal cortex subregions play distinct roles in choices between actions and stimuli. *The Journal of Neuroscience*, *28*(51), 13775–13785. <https://doi.org/10.1523/jneurosci.3541-08.2008>
- Rushworth, M. F. S., & Behrens, T. E. J. (2008). Choice, uncertainty and value in prefrontal and cingulate cortex. *Nature Neuroscience*, *11*(4), 389–397. <https://doi.org/10.1038/nn2066>
- Seeley, W. W., Menon, V., Schatzberg, A. F., Keller, J., Glover, G. H., Kenna, H., Reiss, A. L., & Greicius, M. D. (2007). Dissociable Intrinsic Connectivity Networks for Salience Processing and Executive Control. *The Journal of Neuroscience*, *27*(9), 2349–2356. <https://doi.org/10.1523/jneurosci.5587-06.2007>
- Shadlen, M. N., & Shohamy, D. (2016). Decision Making and Sequential Sampling from Memory. *Neuron*, *90*(5), 927–939. <https://doi.org/10.1016/j.neuron.2016.04.036>
- Shanteau, J., & Anderson, N. H. (1972). Integration theory applied to judgments of the value of information. *Journal of Experimental Psychology*, *92*(2), 266–275. <https://doi.org/10.1037/h0032079>
- Sharot, T., & Garrett, N. (2016). Forming Beliefs: Why Valence Matters. *Trends in Cognitive Sciences*, *20*(1), 25–33. <https://doi.org/10.1016/j.tics.2015.11.002>
- Sharot, T., & Sunstein, C. R. (2020). How people decide what they want to know. *Nature Human Behaviour*, *4*(1), 14–19. <https://doi.org/10.1038/s41562-019-0793-1>
- Shenhav, A., Cohen, J. D., & Botvinick, M. M. (2016). Dorsal anterior cingulate cortex and the value of control. *Nature Neuroscience*, *19*(10), 1286–1291. <https://doi.org/10.1038/nn.4384>

- Shenhav, A., Straccia, M. A., Cohen, J. D., & Botvinick, M. M. (2014). Anterior cingulate engagement in a foraging context reflects choice difficulty, not foraging value. *Nature Neuroscience*, *17*(9), 1249–1254. <https://doi.org/10.1038/nn.3771>
- Smith, S. M., Jenkinson, M., Woolrich, M. W., Beckmann, C. F., Behrens, T. E. J., Johansen-Berg, H., Bannister, P. R., Luca, M. D., Drobnjak, I., Flitney, D. E., Niazy, R. K., Saunders, J., Vickers, J., Zhang, Y., Stefano, N. D., Brady, J. M., & Matthews, P. M. (2004). Advances in functional and structural MR image analysis and implementation as FSL. *NeuroImage*, *23*, S208–S219. <https://doi.org/10.1016/j.neuroimage.2004.07.051>
- Sreenivasan, K. K., & D'Esposito, M. (2019). The what, where and how of delay activity. *Nature Reviews Neuroscience*, *20*(8), 466–481. <https://doi.org/10.1038/s41583-019-0176-7>
- Talluri, B. C., Urai, A. E., Tsetsos, K., Usher, M., & Donner, T. H. (2018). Confirmation bias through selective overweighting of choice-consistent evidence. *Current Biology*, *28*(19), 3128–3135. <https://doi.org/10.1016/j.cub.2018.07.052>
- Wendt, D. (1969). Value of information for decisions. *Journal of Mathematical Psychology*, *6*(3), 430–443. [https://doi.org/10.1016/0022-2496\(69\)90015-7](https://doi.org/10.1016/0022-2496(69)90015-7)
- White, J. K., Bromberg-Martin, E. S., Heilbronner, S. R., Zhang, K., Pai, J., Haber, S. N., & Monosov, I. E. (2019). A neural network for information seeking. *Nature Communications*, *10*(1), 5168. <https://doi.org/10.1038/s41467-019-13135-z>
- Wilson, R. C., Geana, A., White, J. M., Ludvig, E. A., & Cohen, J. D. (2014). Humans use directed and random exploration to solve the explore-exploit dilemma. *Journal of Experimental Psychology: General*, *143*(6), 2074–2081. <https://doi.org/10.1037/a0038199>
